# Supplementary material
Source: PubMed Central journal article supplement (PMC5822422)

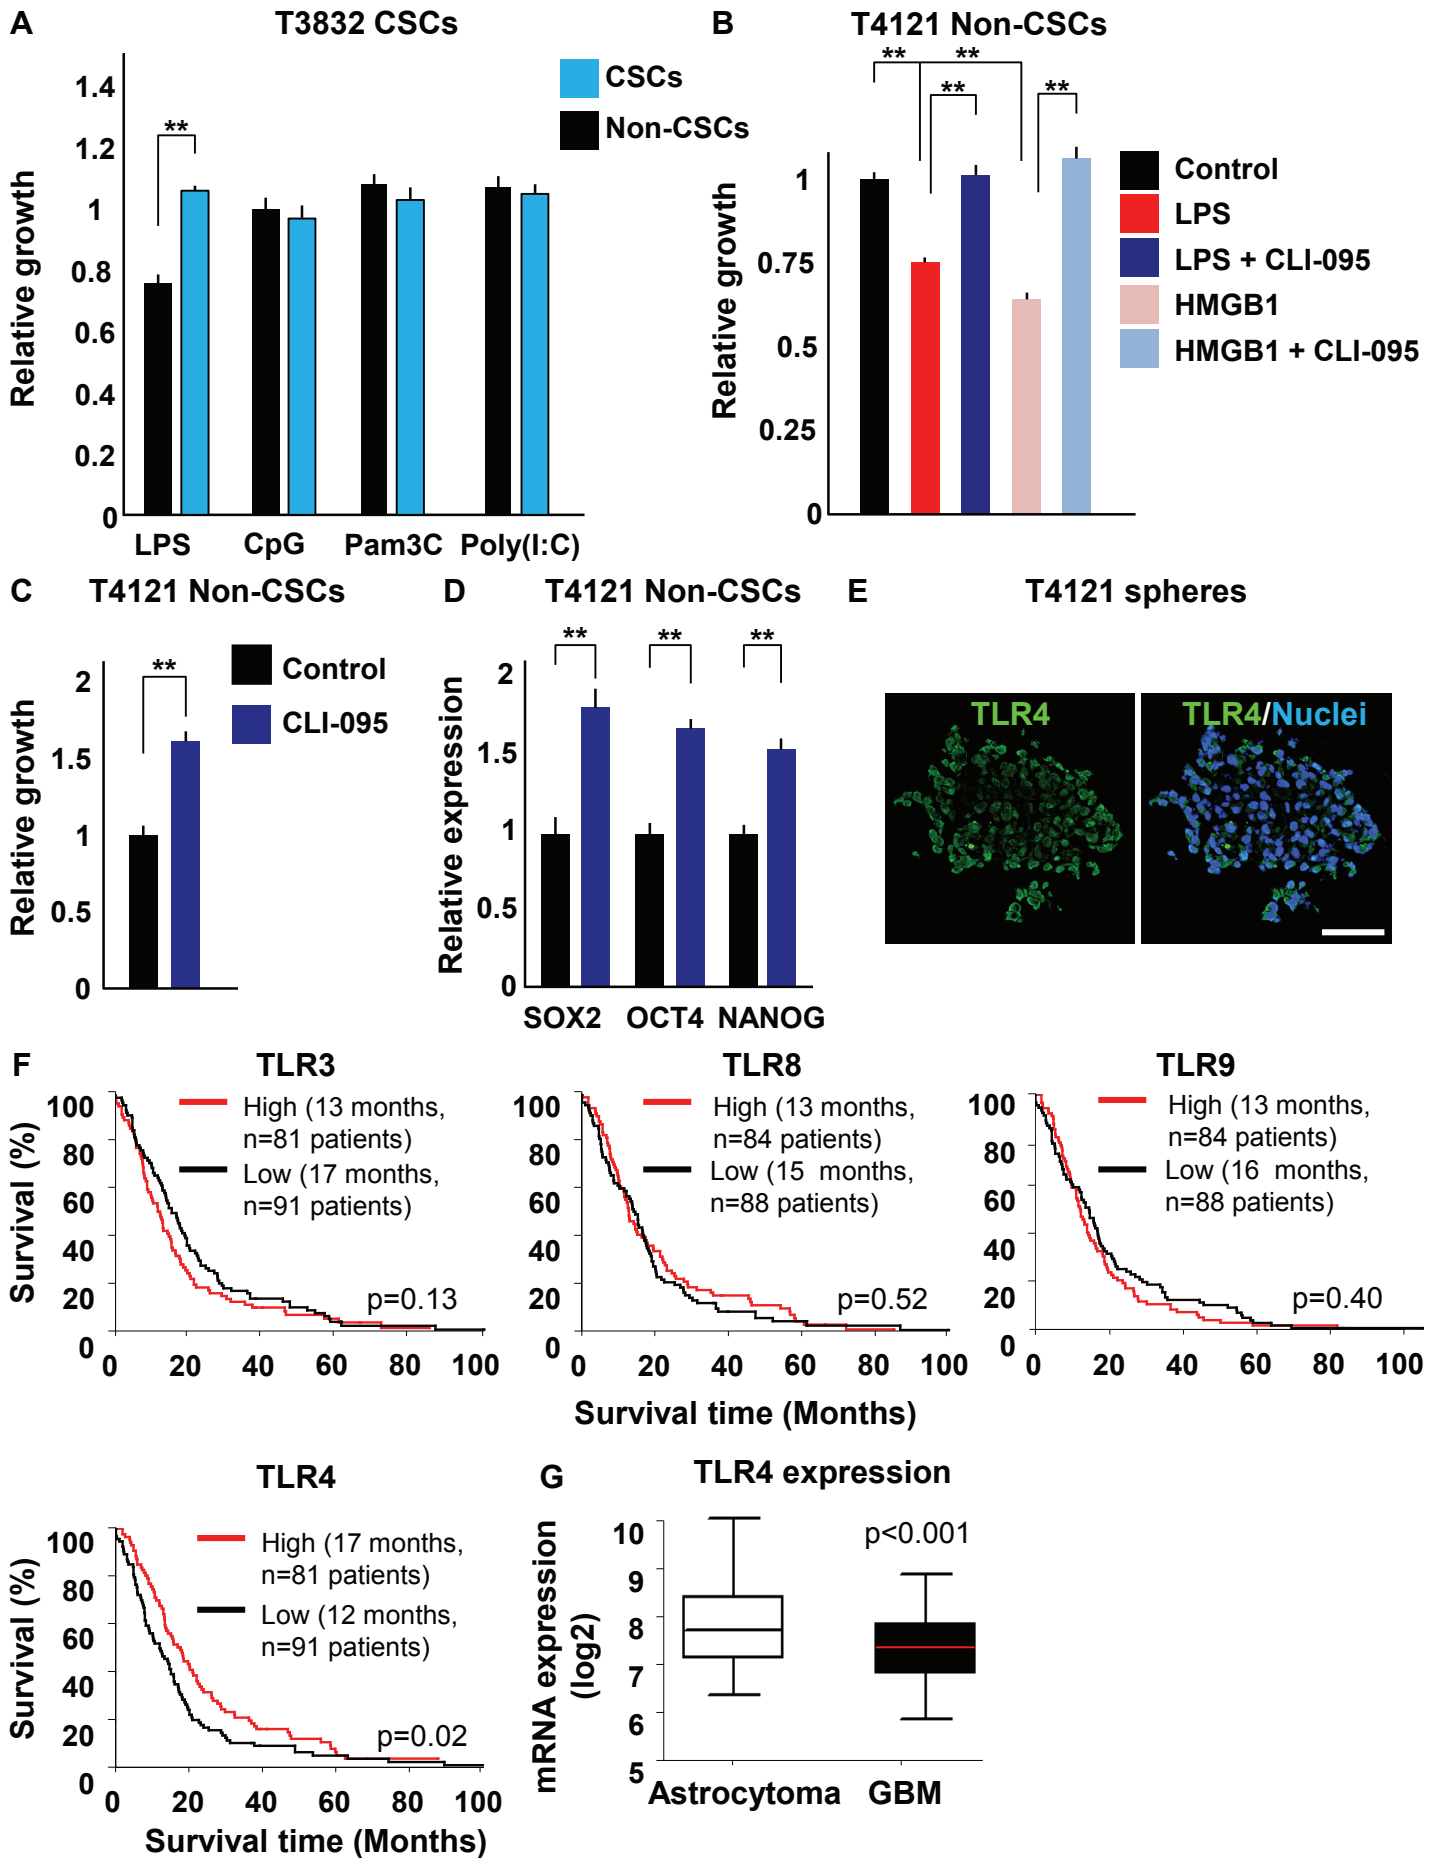

Supplement: NIHMS942558-supplement-Supp_Fig_1.pdf [file NIHMS942558-supplement-Supp_Fig_1.pdf]

**A** T4121 parental xenograft T4121 CSCs (CD133+)

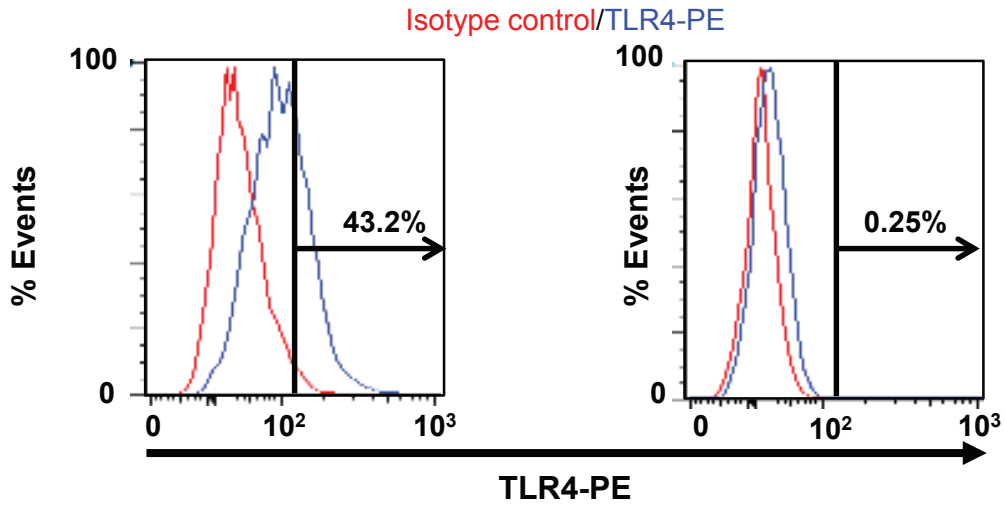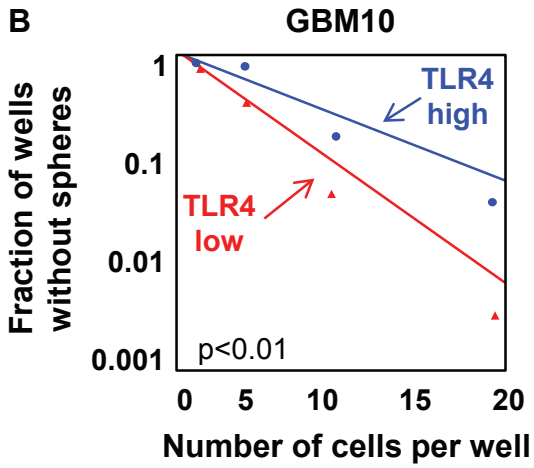

**Stem cell frequencies**

| Group | Estimate (Range) |
|-------|------------------|
| TLR4+ | 1 in 7 (6-10)    |
| TLR4- | 1 in 4 (2-5)     |

**C** T387 CSCs

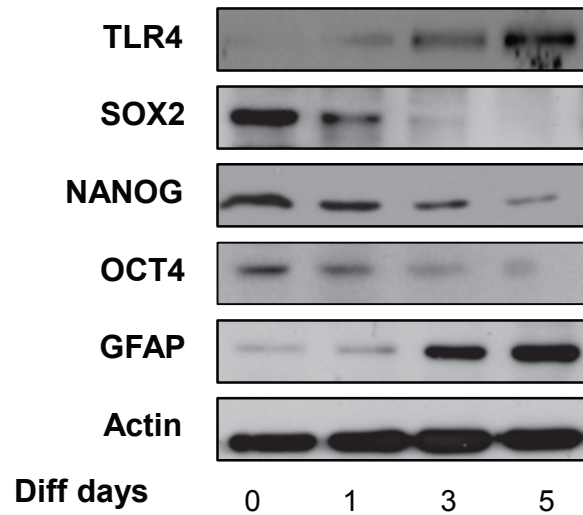

Supplement: NIHMS942558-supplement-Supp_Fig_2.pdf [file NIHMS942558-supplement-Supp_Fig_2.pdf]

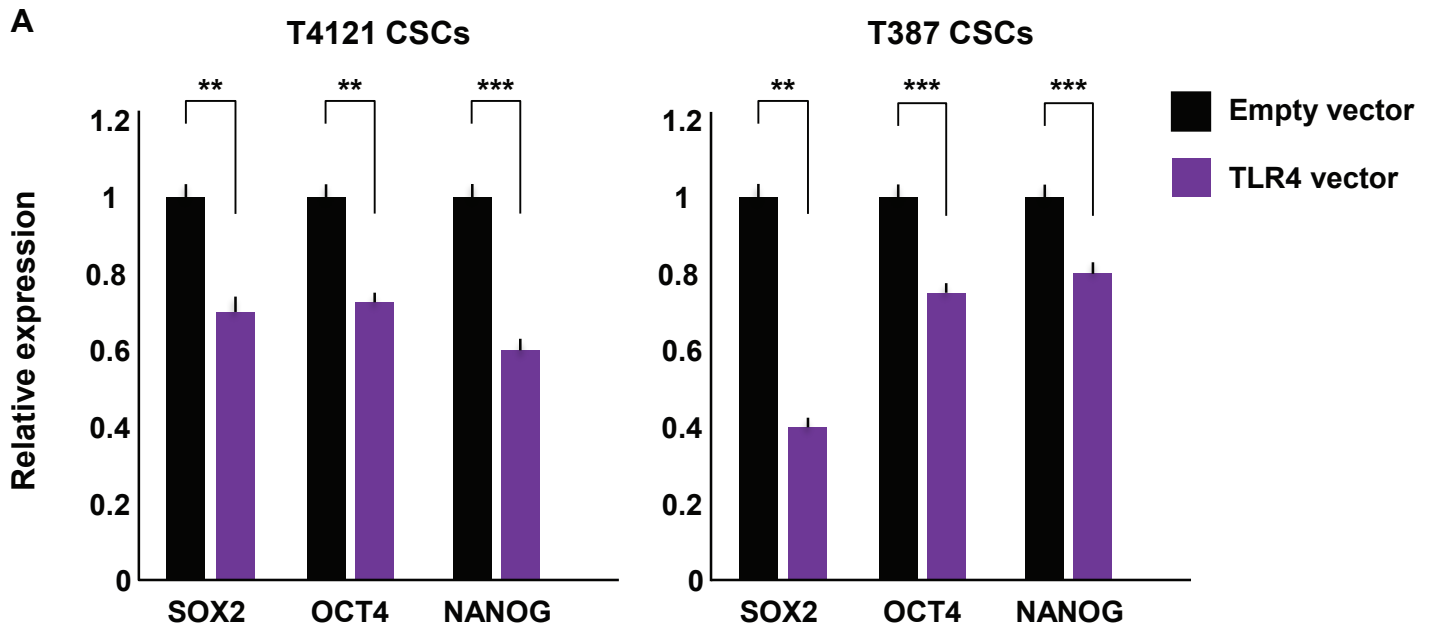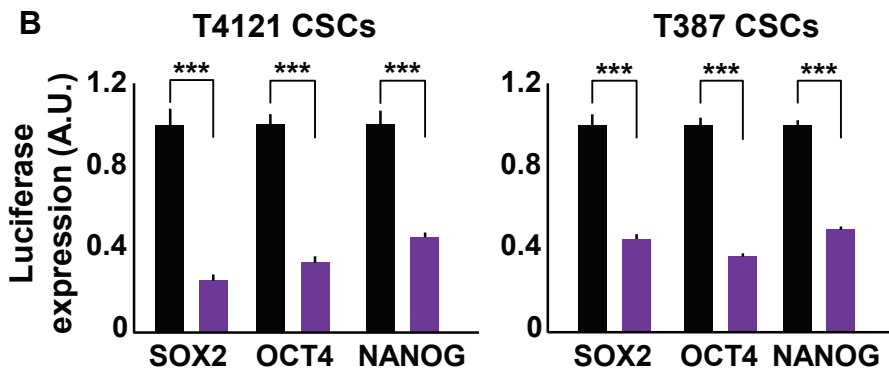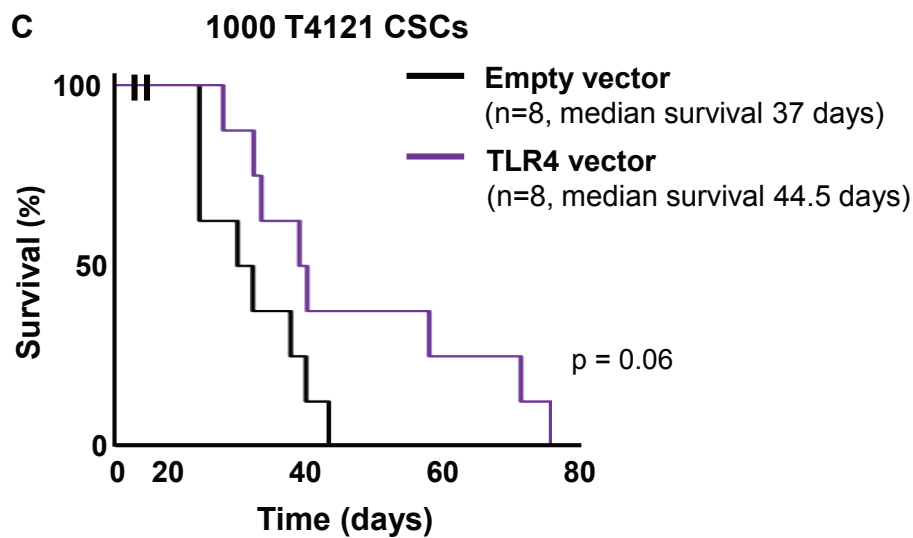

Supplement: NIHMS942558-supplement-Supp_Fig_3.pdf [file NIHMS942558-supplement-Supp_Fig_3.pdf]

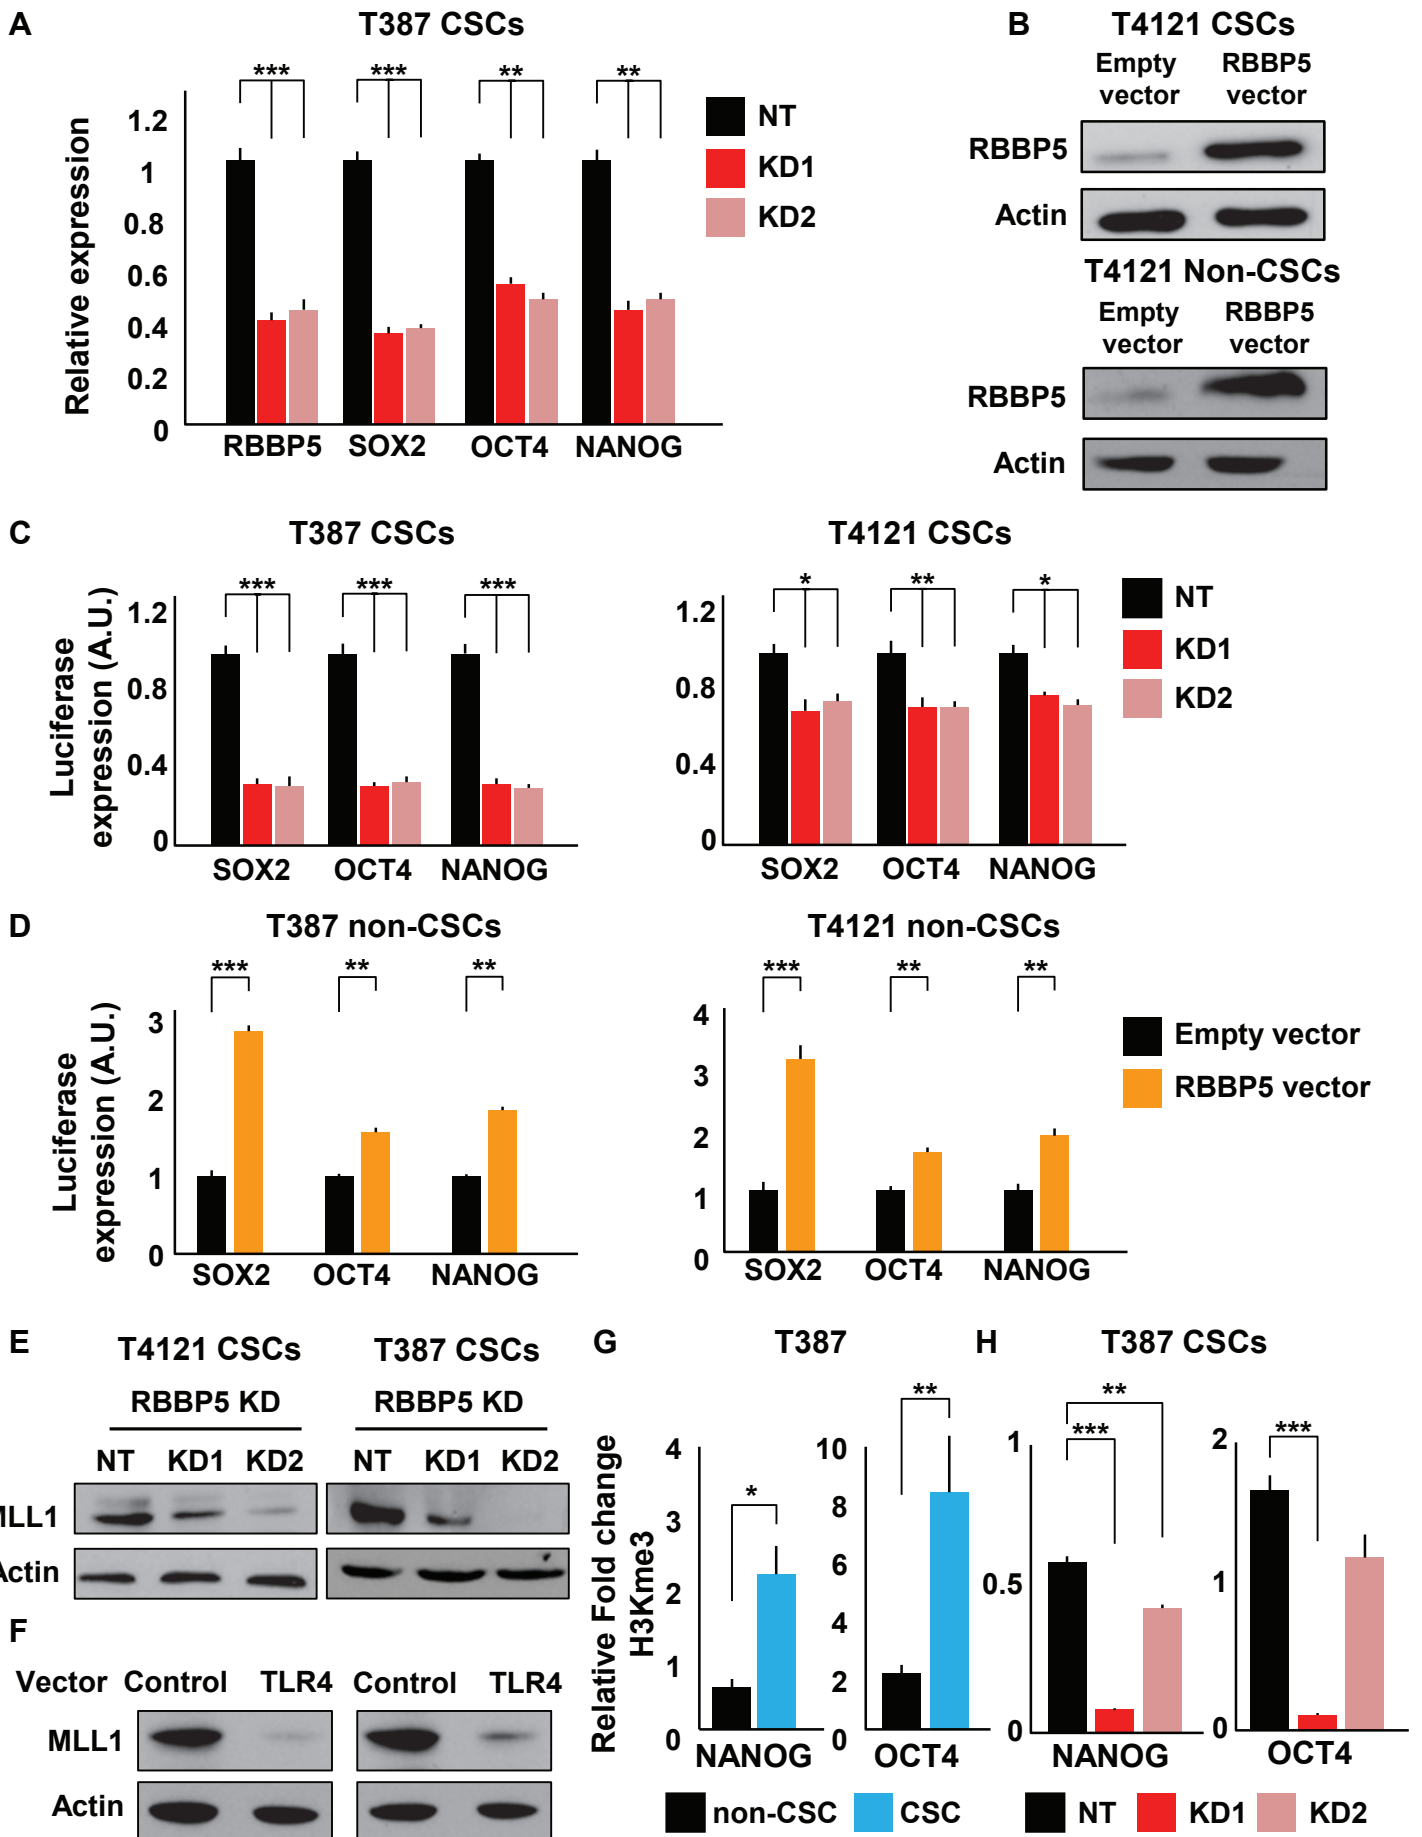

Supplement: NIHMS942558-supplement-Supp_Fig_4.pdf [file NIHMS942558-supplement-Supp_Fig_4.pdf]

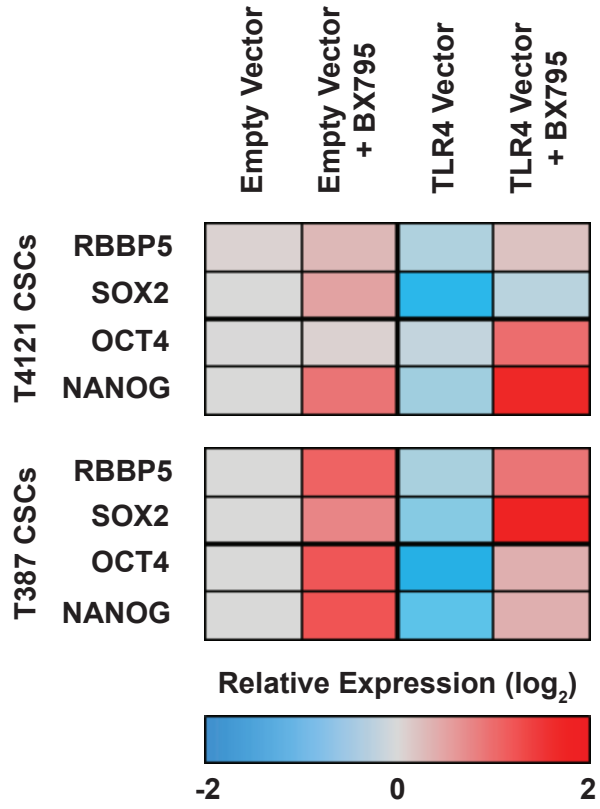

Supplement: NIHMS942558-supplement-Supp_Fig_5.pdf [file NIHMS942558-supplement-Supp_Fig_5.pdf]
